# Supplementary material for: Significance of (sub)clinical thyroid dysfunction and thyroid autoimmunity before conception and in early pregnancy: a systematic review
Source: Oxford University Press journal article supplement (doi:10.1093/humupd/dmr024), 2011-05-28
Supplement: dmr024_Supplementary_Data.zip [file dmr024_Supplementary_Data.zip]

Archive with 11 entries (11 files):
- dmr024supp_figs4.bmp
- dmr024supp_figs5.bmp
- dmr024supp_figs10.bmp
- dmr024supp.pdf
- dmr024supp_figs7.BMP
- dmr024supp_figs8.BMP
- dmr024supp_figs9.BMP
- dmr024supp_figs2.bmp
- dmr024supp_figs3.bmp
- dmr024supp_figs1.bmp
- dmr024supp_figs6.BMP
