# Supplementary material for: Significance of (sub)clinical thyroid dysfunction and thyroid autoimmunity before conception and in early pregnancy: a systematic review
Source: Oxford University Press journal article supplement (doi:10.1093/humupd/dmr024), 2011-05-28
Supplement: dmr024_Supplementary_Data.zip [file dmr024_Supplementary_Data.zip › dmr024supp.pdf]

Supplementary figure 1a. Thyroid antibodies and IVF outcome (pregnancy yes/no)

Supplementary figure 1b. Thyroid antibodies and miscarriage after IVF

Supplementary figure 2. Subclinical hypothyroidism and Gestational Diabetes Mellitus

Supplementary figure 3a. Subclinical hypothyroidism and Pregnancy Induced Hypertension

Supplementary figure 3b. Thyroid antibodies and Pregnancy Induced Hypertension

Supplementary figure 4. Subclinical hypothyroidism and preeclampsia

Supplementary figure 5. Subclinical hypothyroidism and placental abruption

Supplementary figure 6. Subclinical hypothyroidism and Caesarean Section

Supplementary figure 7. Subclinical hypothyroidism and perinatal mortality

Supplementary figure 8a. Subclinical hypothyroidism and birth weight <2500 grams

Supplementary figure 8b. Subclinical hypothyroidism and birth weight >4000 grams

Supplementary figure 9. Thyroid antibodies and post partum thyroid disease

Supplementary figure 10. Subgroup analyses of TPO and Tg antibodies and unexplained subfertility
