# Supplementary figures and images for: Significance of (sub)clinical thyroid dysfunction and thyroid autoimmunity before conception and in early pregnancy: a systematic review
Source: Oxford University Press journal article supplement (doi:10.1093/humupd/dmr024), 2011-05-28

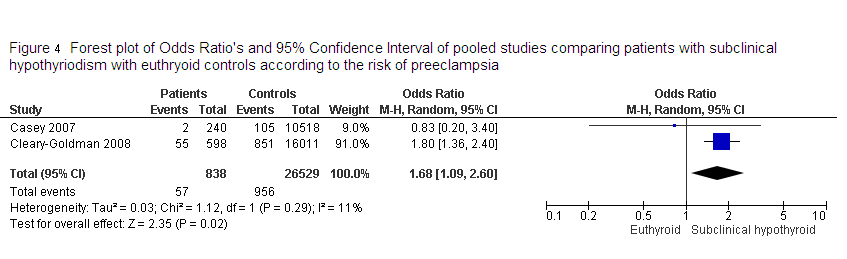

Supplement: dmr024_Supplementary_Data.zip [file dmr024_Supplementary_Data.zip › dmr024supp_figs4.bmp]

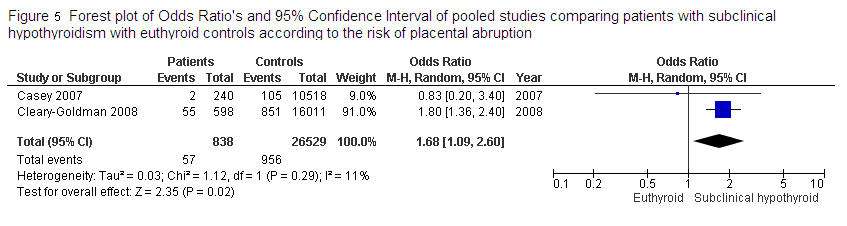

Supplement: dmr024_Supplementary_Data.zip [file dmr024_Supplementary_Data.zip › dmr024supp_figs5.bmp]

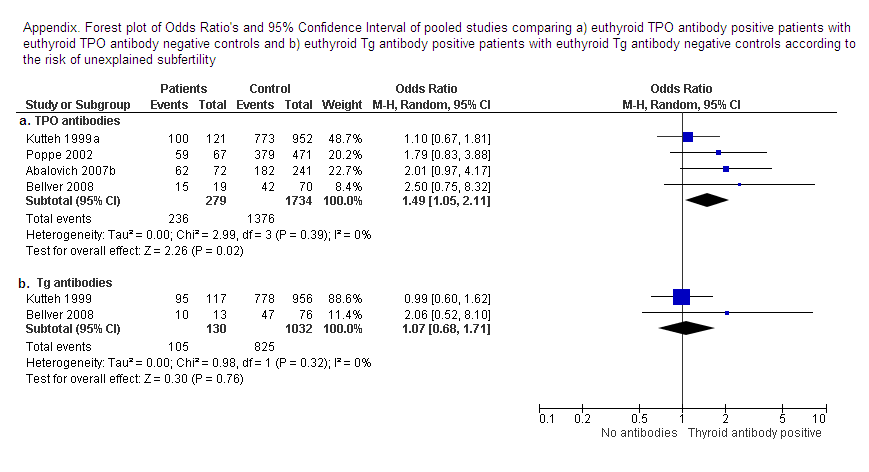

Supplement: dmr024_Supplementary_Data.zip [file dmr024_Supplementary_Data.zip › dmr024supp_figs10.bmp]

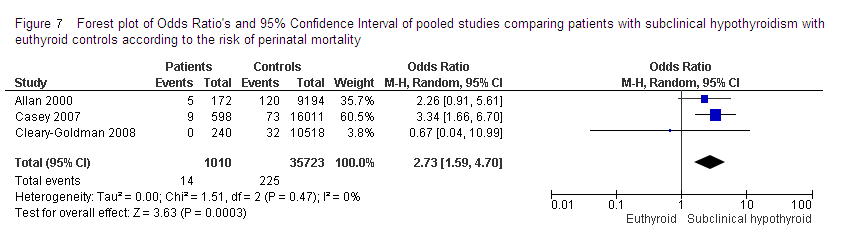

Supplement: dmr024_Supplementary_Data.zip [file dmr024_Supplementary_Data.zip › dmr024supp_figs7.BMP]

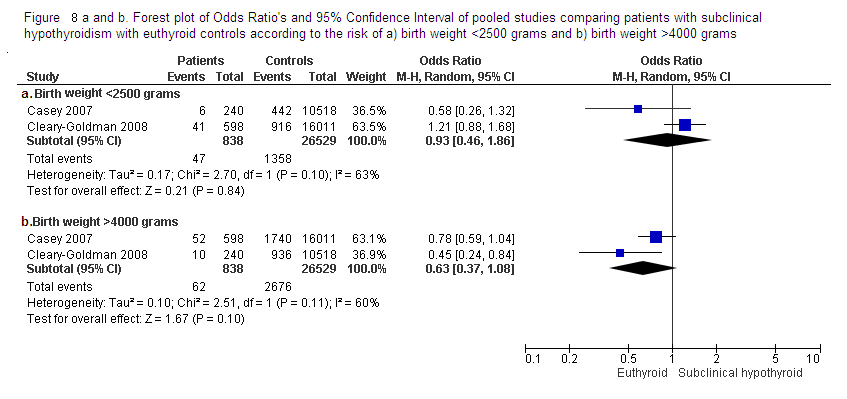

Supplement: dmr024_Supplementary_Data.zip [file dmr024_Supplementary_Data.zip › dmr024supp_figs8.BMP]

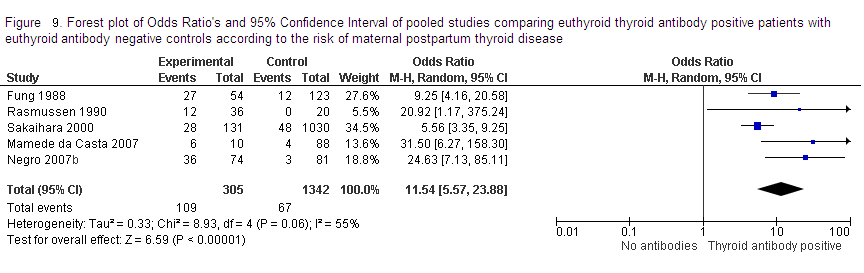

Supplement: dmr024_Supplementary_Data.zip [file dmr024_Supplementary_Data.zip › dmr024supp_figs9.BMP]

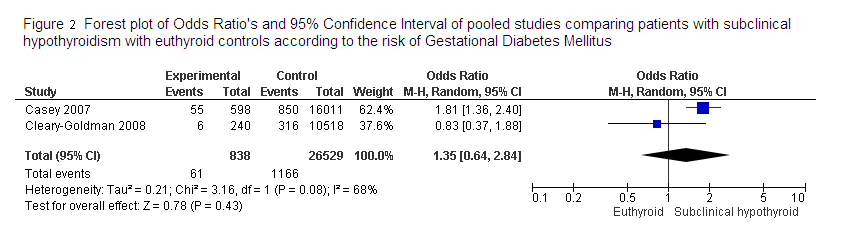

Supplement: dmr024_Supplementary_Data.zip [file dmr024_Supplementary_Data.zip › dmr024supp_figs2.bmp]

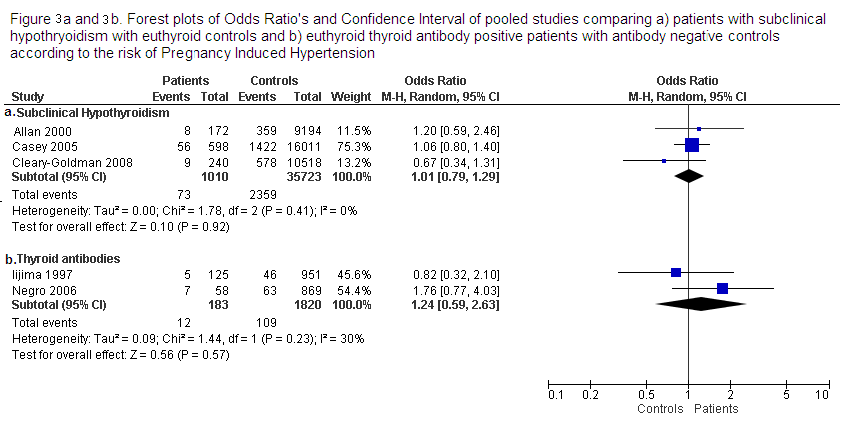

Supplement: dmr024_Supplementary_Data.zip [file dmr024_Supplementary_Data.zip › dmr024supp_figs3.bmp]

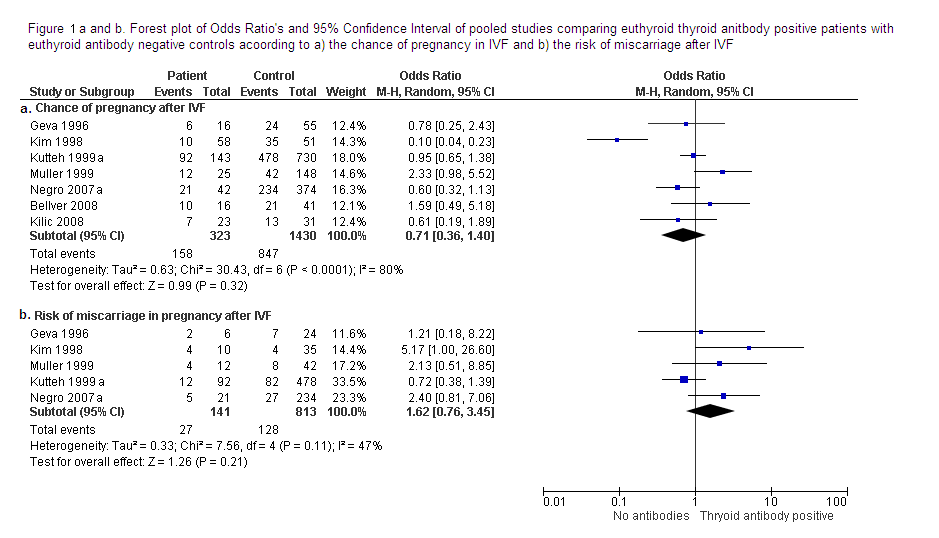

Supplement: dmr024_Supplementary_Data.zip [file dmr024_Supplementary_Data.zip › dmr024supp_figs1.bmp]

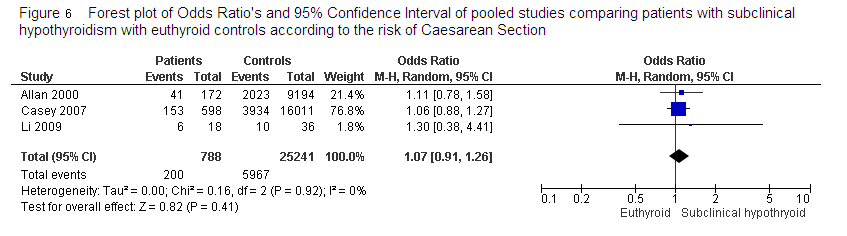

Supplement: dmr024_Supplementary_Data.zip [file dmr024_Supplementary_Data.zip › dmr024supp_figs6.BMP]
